# Supplementary material for: Multi-Level Biological Network Analysis and Drug Repurposing Based on Leukocyte Transcriptomics in Severe COVID-19: In Silico Systems Biology to Precision Medicine
Source: MDPI journal article supplement (doi:10.3390/jpm12071030), 2022-06-23
Supplement: s1 [file s1]

**Table S1.** Common differentially expressed genes (DEGs) from the two GEO datasets \*.

| DEGs                       | Gene Symbol                                                                                                                                                                                                                                                                                                                                                                                                                                                                                                                                                                                                                                                                                                                                                                                                                                                                                                                                                                                                                                                                                                                                                                                                                                                                                                                                                                                                                                                                                                                                                                                                                                                      |
|----------------------------|------------------------------------------------------------------------------------------------------------------------------------------------------------------------------------------------------------------------------------------------------------------------------------------------------------------------------------------------------------------------------------------------------------------------------------------------------------------------------------------------------------------------------------------------------------------------------------------------------------------------------------------------------------------------------------------------------------------------------------------------------------------------------------------------------------------------------------------------------------------------------------------------------------------------------------------------------------------------------------------------------------------------------------------------------------------------------------------------------------------------------------------------------------------------------------------------------------------------------------------------------------------------------------------------------------------------------------------------------------------------------------------------------------------------------------------------------------------------------------------------------------------------------------------------------------------------------------------------------------------------------------------------------------------|
| Upregulated                | KIF18B, BTN3A1, NEK2, RSAD2, TMEM140, IFI6, SP140, PRRT4, KCNN3, HJURP, TYMS, LEFTY2, ZNF595, ITM2C, ZNF493, PTTG1, CDC25A, SPAG5, NBN, TOP2A, SAMD9, PARP9, IFIT3, AIM2, IFIT1, DDX58, AURKB, CCR10, TICRR, PSMB9, CARD16, GRTP1, MZB1, LGALS3BP, IFI35, PCP2, NMI, IFIT5, TK1                                                                                                                                                                                                                                                                                                                                                                                                                                                                                                                                                                                                                                                                                                                                                                                                                                                                                                                                                                                                                                                                                                                                                                                                                                                                                                                                                                                  |
| Downregulated              | HLA-DRA, EPM2A, NAAA, CD44, MCUB, STARD7, TRIO, IDH3B, KYAT3, RPL13A, EIF4B, MYO1G, HAVCR2, RPL22, RASSF7, ATP6V1F, GLUD1, LPAR1, TAB1, NRG1, CYB561A3, LPXN, RBMX, CSNK2B, DMAC1, SCAI, RPL19, GOLGA8B, EOGT, UBXN1, RAD23A, ADCK5, LGALS3, ALDH2, RALGPS1, CAT, TWF2, PTER, PGLS, LDLRAD4, SDAD1, HDAC3, PTPN13, SUGP2, IRF8, ASB1, MIOS, AHNAK, CTSK, ERGIC3, PSMB7, PYCARD, ZBTB22, MAP3K4, TCAF2, PREP, EID1, NPEPL1, MFNG, CAMK2D, TBC1D9, SLC46A2, XKR7, CREBL2, TSPAN3, RPS20, RASGRP4, MYO9A, TUBGCP2, SRSF11, PLCB1, RRN3, YTHDC2, GLMP, MED14, NCKAP1L, CENPB, ICAM3, POMT2, MAP10, THAP12, GLUD2, MAN2C1, ADGRE1, RUBCNL, IPO5, USP9X, GNS, LY86, ASGR1, CERS5, ASB13, CPNE1, CEMIP2, MPDU1, UFL1, EIF2B1, PEPD, PARL, SNX22, CREBZF, ANXA5, MTCH2, FCN1, RAB34, GPAT4, DDX42, MTPAP, KPNA1, SNX17, NAGA, IARS2, GSTK1, MALT1, GUSB, HMOX1, SF3B1, CCDC124, TXNRD2, OXA1L, DOP1A, KLHL36, WDR55, OPN3, CYFIP2, KIAA1143, NEPRO, DYRK2, GHITM, PTRH2, AKAP8, STK11IP, RTL6, BTF3, ZNF783, EEF1D, ANKRD42, RNPEP, STAB1, DET1, SH3BGR1, SCYL1, EIF3B, TOMM20, COMMD10, UPRT, TGFB1, SURF1, TAGLN, SLC25A6, GIMAP6, BCAT1, CRYBG3, PHF14, ARFGAP2, RPL7, TRUB1, SUMF1, FOXO1, PIP5K1A, CLK2, VPS16, INTS11, NOL6, SLC25A13, MEF2C, NOA1, TOMM22, ZDHHC6, ZPR1, PLXND1, INTS9, SYNJ2BP, PSMD4, SYNGR2, BCLAF1, MRPS17, ERCC3, ZDHHC3, GAPVD1, KDM4C, MYCL, SLC25A37, CSDE1, UBE2J2, SUGT1, ARPIN, DHX57, TUFM, TEPSIN, CTSO, HNRNPDL, MAN2B1, CDC16, TPT1, SMARCA1, NPC1, ITFG2, GPATCH2, ELP2, ANAPC2, MAP3K14, DUSP22, CDK5, THTPA, WDR73, HEATR6, LRRC58, ARHGAP24, DPYD, GALK1, FLII, NPRL2, LILRA1, NBPf8, LARP4B, MTCH1, PCID2, SMIM7, GGA2, SNTB2 |
| Both up- and downregulated | IGBP1, ZBTB14, ZNF248, DHX32, KIAA0825, BAG1, LTA4H, RPL11, HTR7, GPR15, POFUT1, PLIN5, ABCB7, VSIG4, PPP4C, SLC8A1, DOCK5, IRGQ, CIPC, ST6GALNAC1, CYBB, VPS8, DSC2, PNPLA8, SEC61A2, SPRED1, VCAN, SMARCD3, TBL1XR1, RPL17, FLOT2, RPGR, RFX2, TIMM10B, ATP6V1C1, NOTCH2, STX5, ZNF266, SUDS3, NRDC, WDR91, CHN2, WDR45, KIAA0753, FCHSD2, DICER1, SLC38A6, ZNF785, EIF3K, PIGG, ZDHHC20, BOD1, MDFIC, POLR2B, SLITRK4, MTRR, SIDT2, RCAN3, GDF7, AHCYL2, TBC1D14, FCGRT, COG8, SIAH1, EVI5, SLC39A1, GALNT2, FAM135A, AREL1, FAM168B, ZSWIM6, AIF1, CLK3, ZNF263, SOWAHC, SFT2D2, NPL, IGF1R, WDR37, TPCN1, TRAK1, DPYSL2, PIAS3, CSF1R, ERCC1, ELP1, NDUFS2, SASH1, FAM20A, FAM204A, STX16, SLC22A4, RALGAPA1, CACNA2D3, SPSB3, RAPGEF6, SIRPA, LAG3, INSYN2B, MOCS1, EGFL7, ZBTB32, MANF, BTN3A2, GALM, UHRF1, BAK1, IRF7, SRM, PCDHGA12, DNAJC1, PSME1, E2F7, CDC20, BTN3A3, UBE2L6, DHRS9, UCHL1, ARL17B, KY, BIRC5, MYBL2, LIF, NME1                                                                                                                                                                                                                                                                                                                                                                                                                                                                                                                                                                                                                                                                                                                     |

\* Leukocyte transcriptomic profiles came from GSE164805 and GSE154998 datasets. The criterion for being DEGs were FDR q-value < 0.05 and |log2 FC| > 1. A total of 384 common DEGs were found including 39 upregulated and 221 downregulated DEGs. The remaining 124 genes were found in both up- and downregulated expression.
