# Supplementary material for: Multi-Level Biological Network Analysis and Drug Repurposing Based on Leukocyte Transcriptomics in Severe COVID-19: In Silico Systems Biology to Precision Medicine
Source: MDPI journal article supplement (doi:10.3390/jpm12071030), 2022-06-23
Supplement: s1 [file s1]

**Table S8.** Topological parameters of the 19 hub genes in the PPIN.

| Gene   | Degree | Betweenness | Closeness | Clustering coefficient |
|--------|--------|-------------|-----------|------------------------|
| RPL11  | 25     | 0.030191133 | 0.3157316 | 0.3500000              |
| POLR2B | 24     | 0.069496043 | 0.3122960 | 0.1920290              |
| AURKB  | 24     | 0.055793452 | 0.2983368 | 0.3731884              |
| RPS20  | 23     | 0.035165157 | 0.3160793 | 0.3715415              |
| CDC25A | 22     | 0.097609750 | 0.3261364 | 0.3896104              |
| RPL13A | 22     | 0.049903596 | 0.3174779 | 0.3939394              |
| RPL7   | 21     | 0.058813212 | 0.3265074 | 0.4380952              |
| BIRC5  | 20     | 0.043279916 | 0.3072805 | 0.4736842              |
| RPL19  | 20     | 0.027497957 | 0.3143483 | 0.4421053              |
| CDC20  | 19     | 0.014817251 | 0.2881526 | 0.5906433              |
| TOP2A  | 19     | 0.030785964 | 0.3037037 | 0.5497076              |
| CD44   | 18     | 0.069909230 | 0.3017876 | 0.1111111              |
| TYMS   | 18     | 0.039979277 | 0.2907801 | 0.5228758              |
| RPL17  | 17     | 0.006197219 | 0.3040254 | 0.5882353              |
| DICER1 | 17     | 0.103047520 | 0.3295063 | 0.1985294              |
| MYBL2  | 17     | 0.012582020 | 0.2864271 | 0.6764706              |
| EEF1D  | 17     | 0.025408882 | 0.3030623 | 0.3897059              |
| SDAD1  | 17     | 0.027197302 | 0.2864271 | 0.3455882              |
| DDX58  | 17     | 0.082403659 | 0.3136612 | 0.3676471              |

**Table S9.** Topological parameters of the 15 bottleneck genes in the PPIN.

| Gene   | Degree | Betweenness | Closeness | Clustering coefficient |
|--------|--------|-------------|-----------|------------------------|
| CAT    | 14     | 0.10530827  | 0.3076099 | 0.0989011              |
| DICER1 | 17     | 0.10304752  | 0.3295063 | 0.1985294              |
| ANXA5  | 15     | 0.09965245  | 0.3265074 | 0.1714286              |
| CDC25A | 22     | 0.09760975  | 0.3261364 | 0.3896104              |
| CSF1R  | 16     | 0.08715357  | 0.3153846 | 0.2000000              |
| DDX58  | 17     | 0.08240366  | 0.3136612 | 0.3676471              |
| CD44   | 18     | 0.06990923  | 0.3017876 | 0.1111111              |
| POLR2B | 24     | 0.06949604  | 0.3122960 | 0.1920290              |
| USP9X  | 7      | 0.05970566  | 0.2630614 | 0.0000000              |
| RPL7   | 21     | 0.05881321  | 0.3265074 | 0.4380952              |
| GUSB   | 9      | 0.05786831  | 0.2878636 | 0.1666667              |
| AURKB  | 24     | 0.05579345  | 0.2983368 | 0.3731884              |
| PSMD4  | 16     | 0.05543467  | 0.3112798 | 0.2250000              |
| HMOX1  | 7      | 0.05278211  | 0.2847222 | 0.2857143              |
| TOMM20 | 13     | 0.05029161  | 0.2901921 | 0.1025641              |
