# Supplementary material for: Multi-Level Biological Network Analysis and Drug Repurposing Based on Leukocyte Transcriptomics in Severe COVID-19: In Silico Systems Biology to Precision Medicine
Source: MDPI journal article supplement (doi:10.3390/jpm12071030), 2022-06-23
Supplement: s1 [file s1]

### MCODE 1

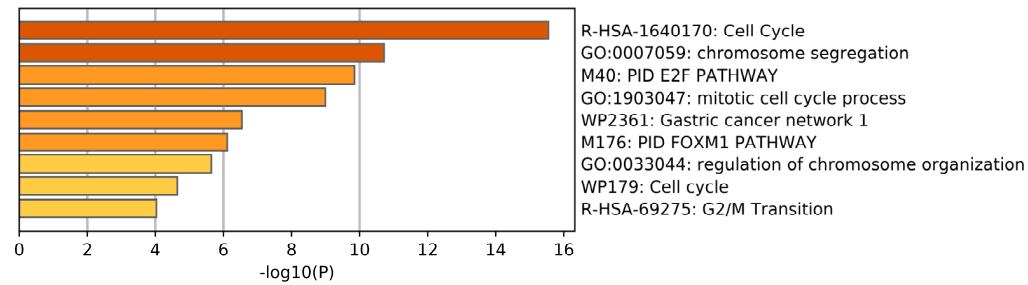

### MCODE 2

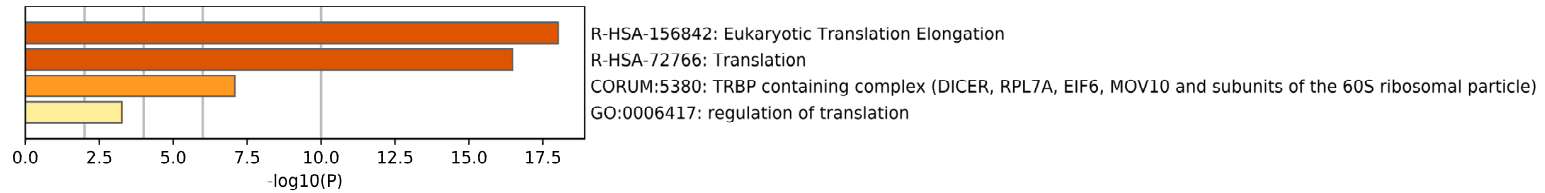

### MCODE 3

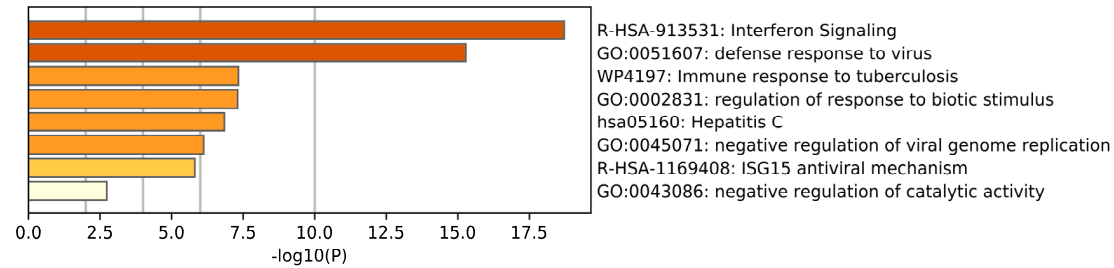

**Figure S1.** Functional enrichment analysis of genes in each MCODE module. The enrichment graphs were plotted using Metascape.

### MCODE 1

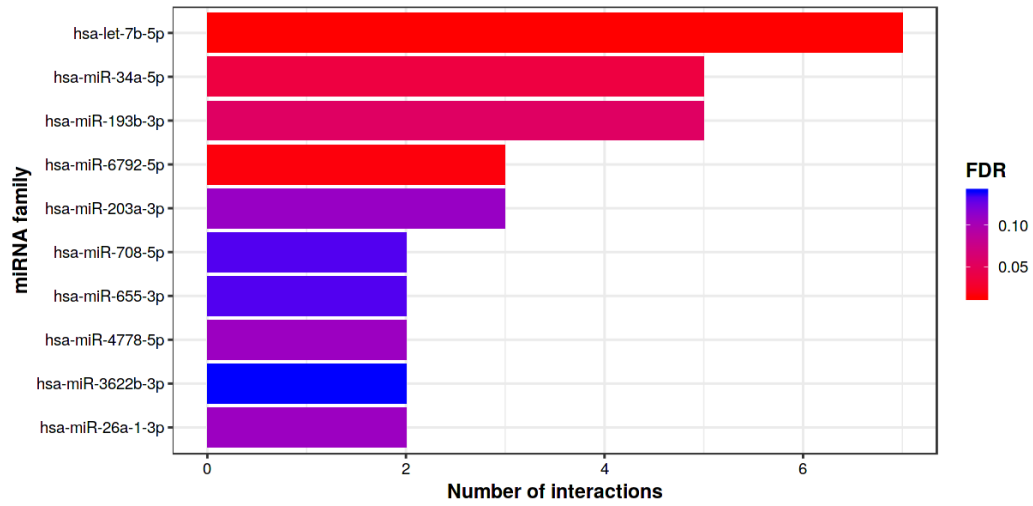

### MCODE 2

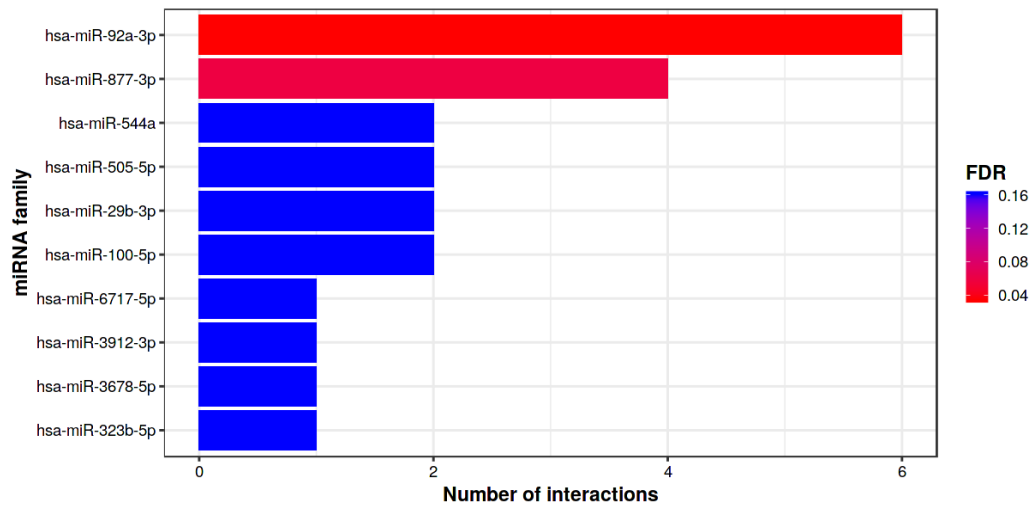

### MCODE 3

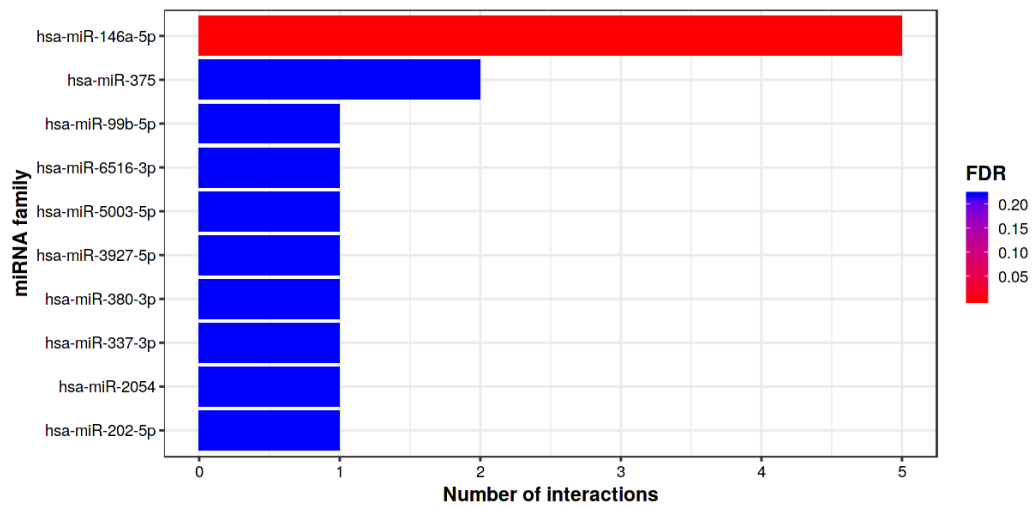

**Figure S2.** Bar graph of the number of interactions of miRNAs in each gene in MCODE modules using MIENTURNET based on miRTarBase database. The bar graph color represents the interaction significance.

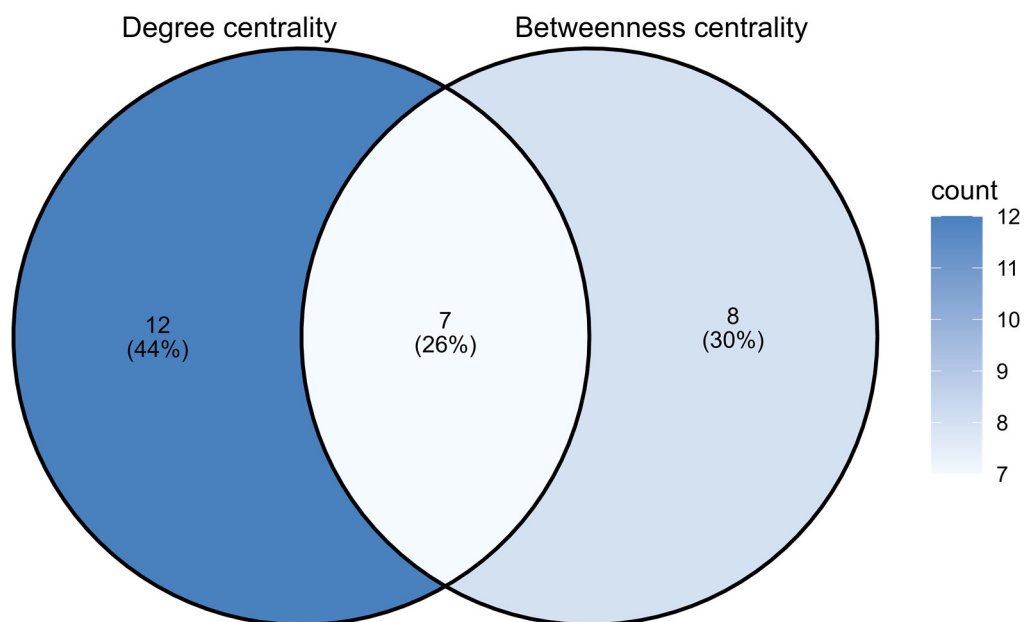

**Figure S3.** Venn diagram of the key genes in the degree and betweenness centrality.

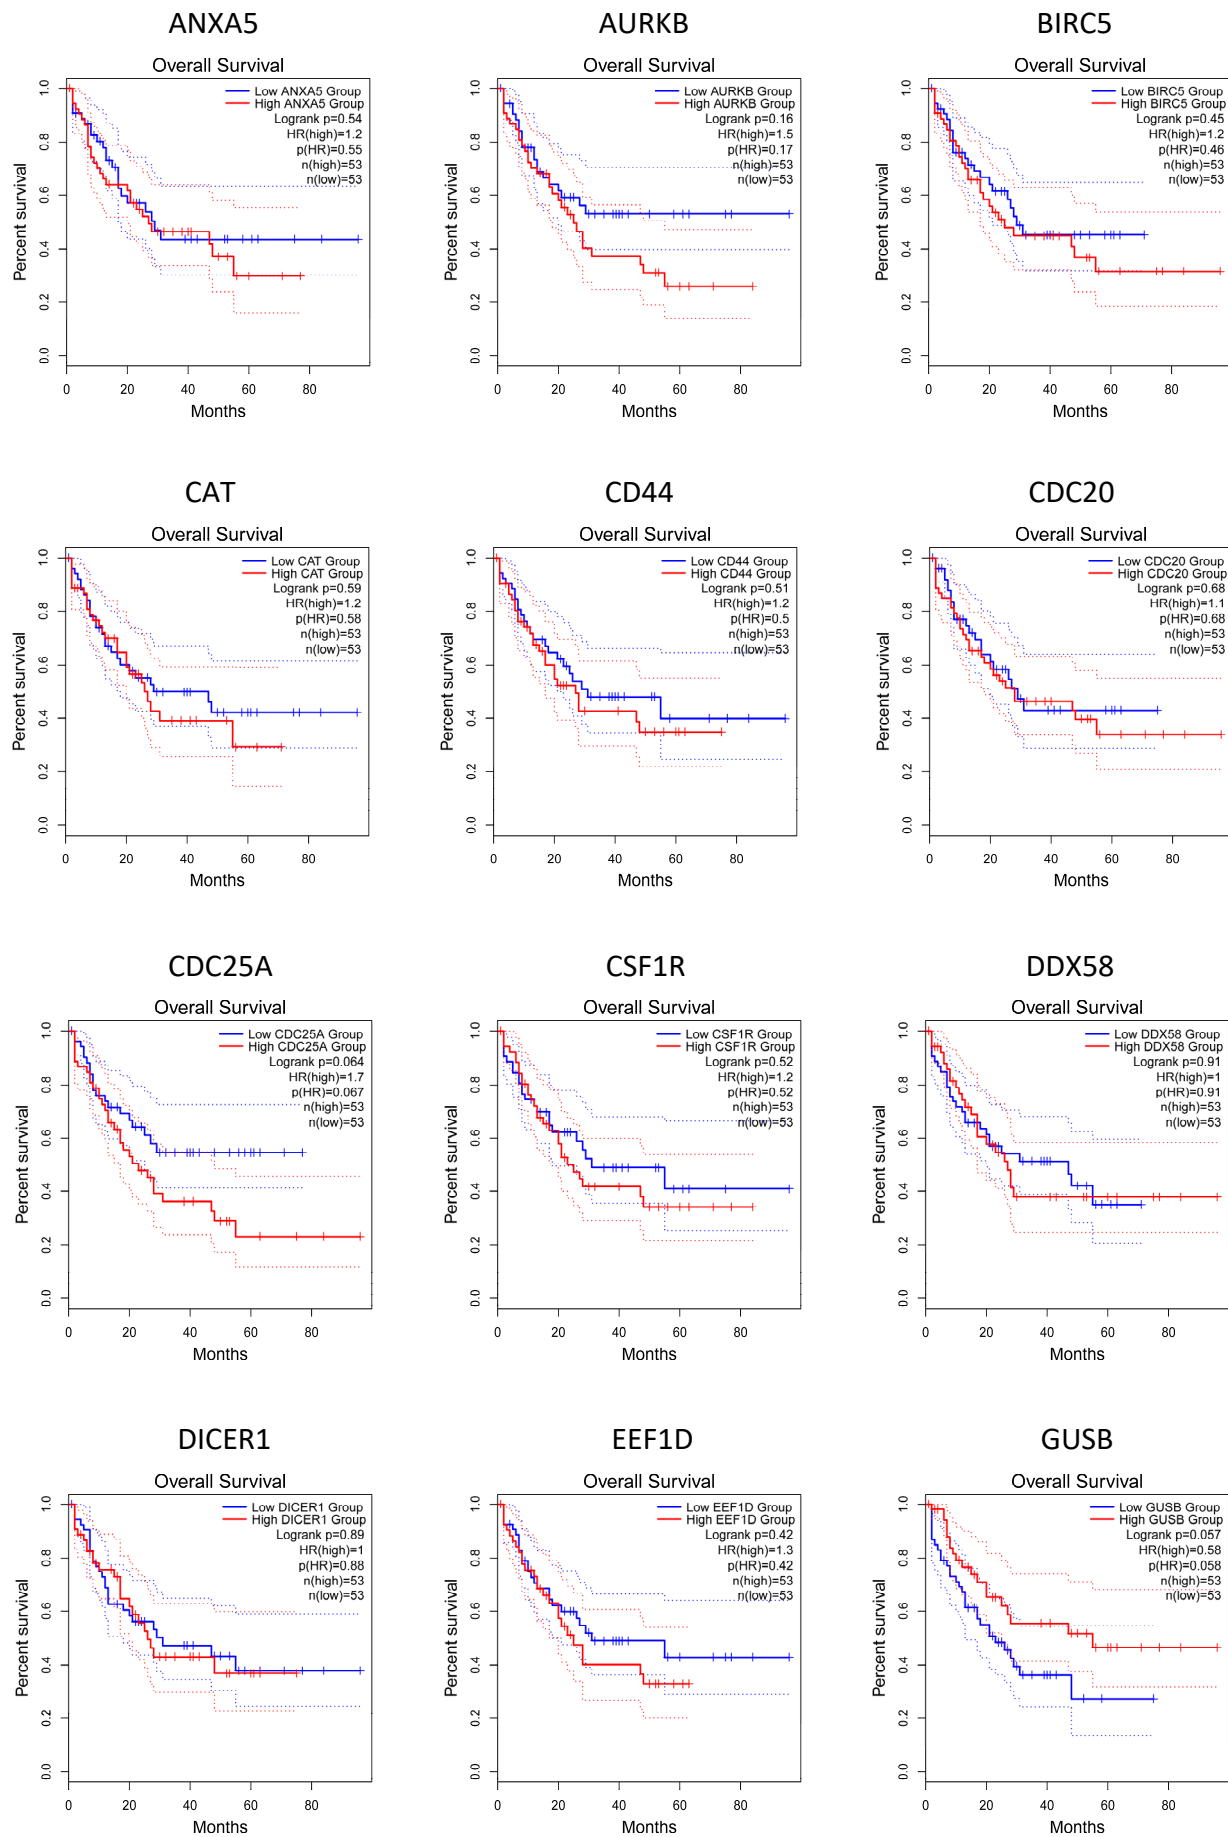

Figure S4. Cont.

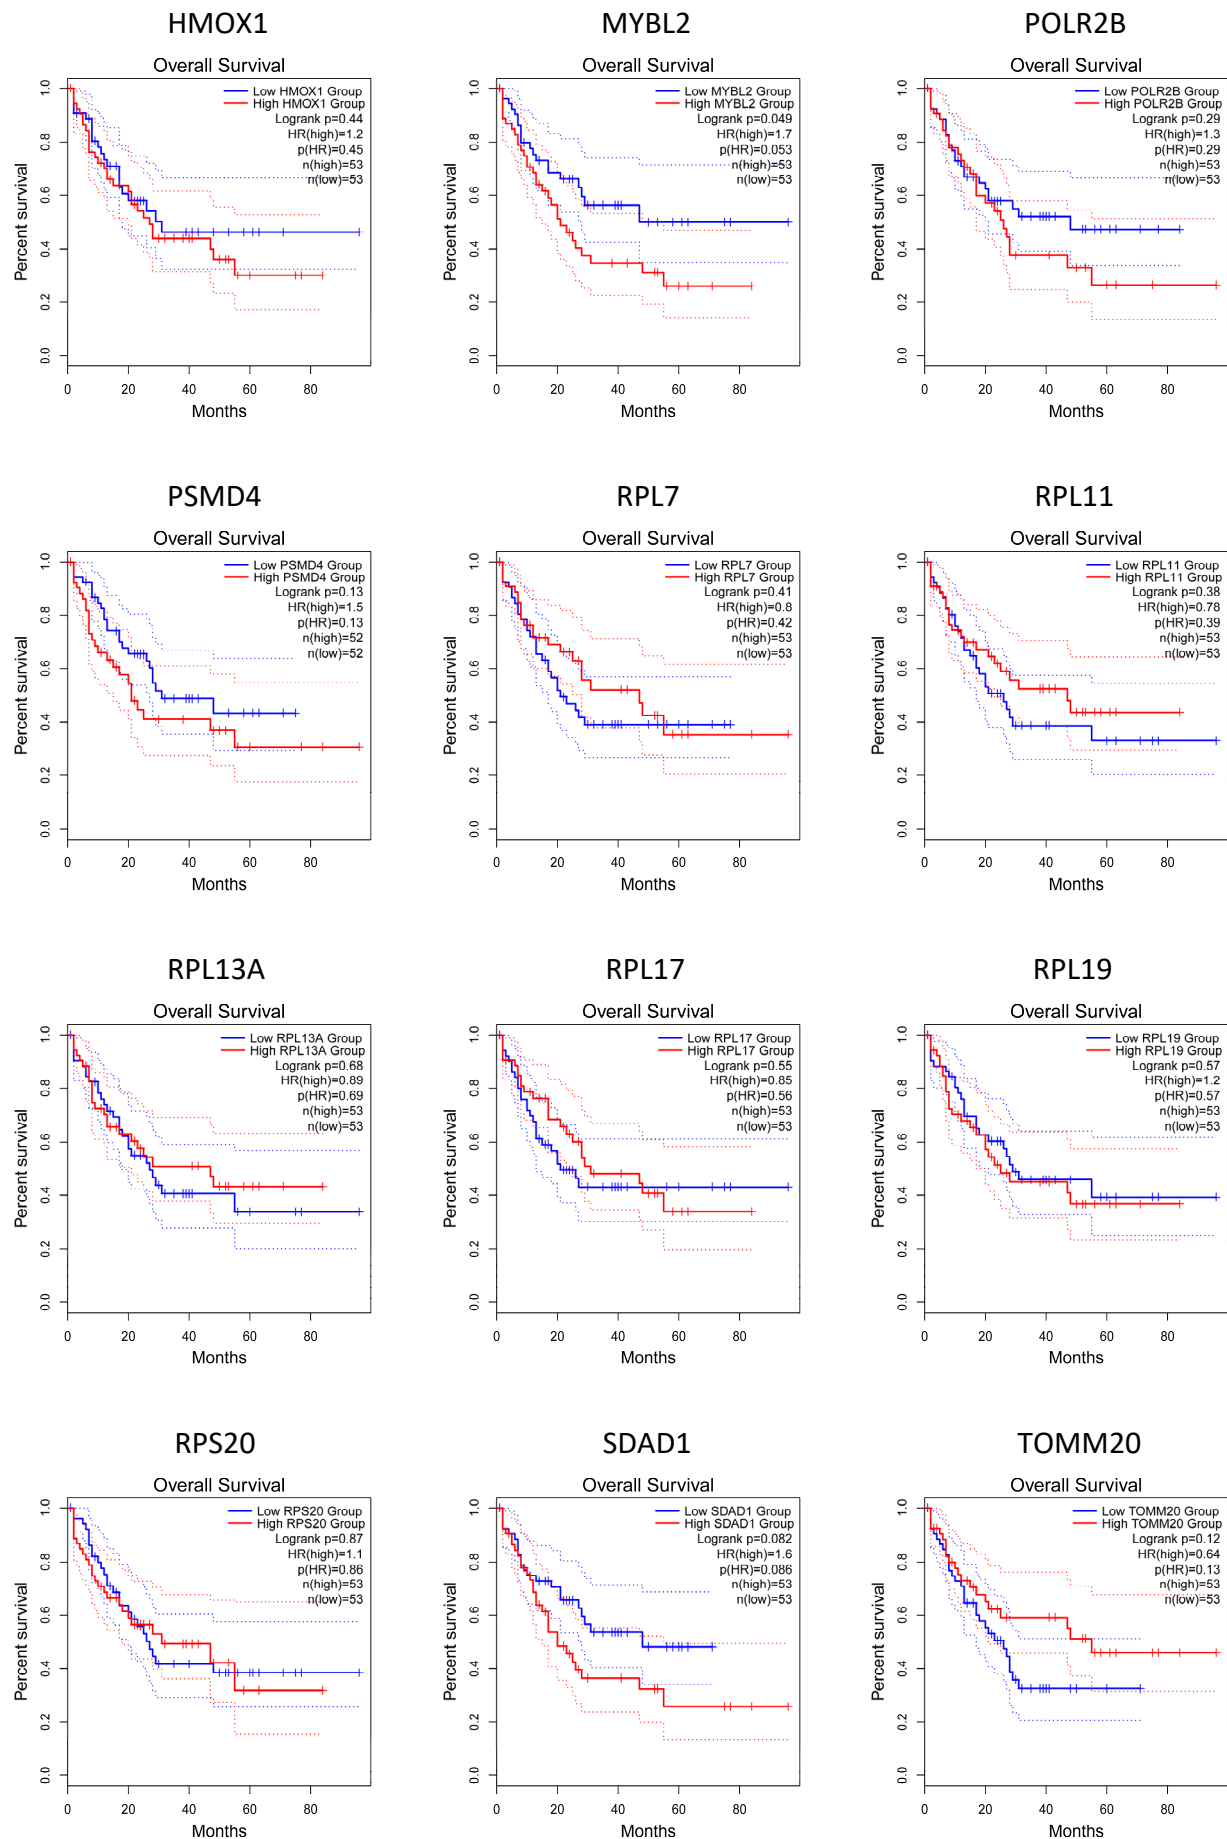

Figure S4. Cont.

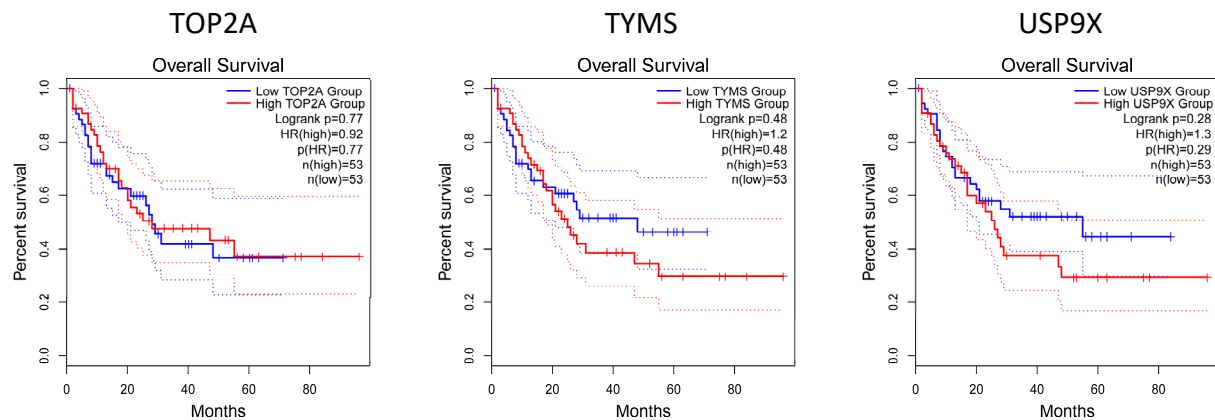

**Figure S4.** Kaplan-Meier overall survival analysis of the hub and bottleneck genes in severe COVID-19. The curves were plotted using Gene Expression Profiling Interactive Analysis (GEPIA2). Acute myeloid leukemia (LAML) from The Cancer Genome Atlas (TCGA) database was used as a cell type model to find key survival genes in cytokine storm-related myeloid cells such as neutrophils, monocytes, and macrophages.
